# Supplementary material
Source: MDPI journal article supplement (https://www.mdpi.com/2073-4344/14/1/52)
Supplement: s1 [file s1 › catalysts-2776642-supplementary.pdf]

Supplementary Information

# Engineering Electrode Polarity for Enhancing In Situ Generation of Hydroxyl Radicals Using Granular Activated Carbon

Stephanie Sarrouf <sup>1</sup>, Amir Taqieddin <sup>2</sup>, Muhammad Fahad Ehsan <sup>1</sup> and Akram N. Alshawabkeh <sup>1,\*</sup>

<sup>1</sup> Department of Civil & Environmental Engineering, Northeastern University, Boston, MA 02115, USA; sarrouf.s@northeastern.edu (S.S.); m.ehsan@northeastern.edu (M.F.E.)

<sup>2</sup> Department of Mechanical & Industrial Engineering, Northeastern University, Boston, MA 02115, USA; taqieddin.a@northeastern.edu

\* Correspondence: a.alshawabkeh@northeastern.edu

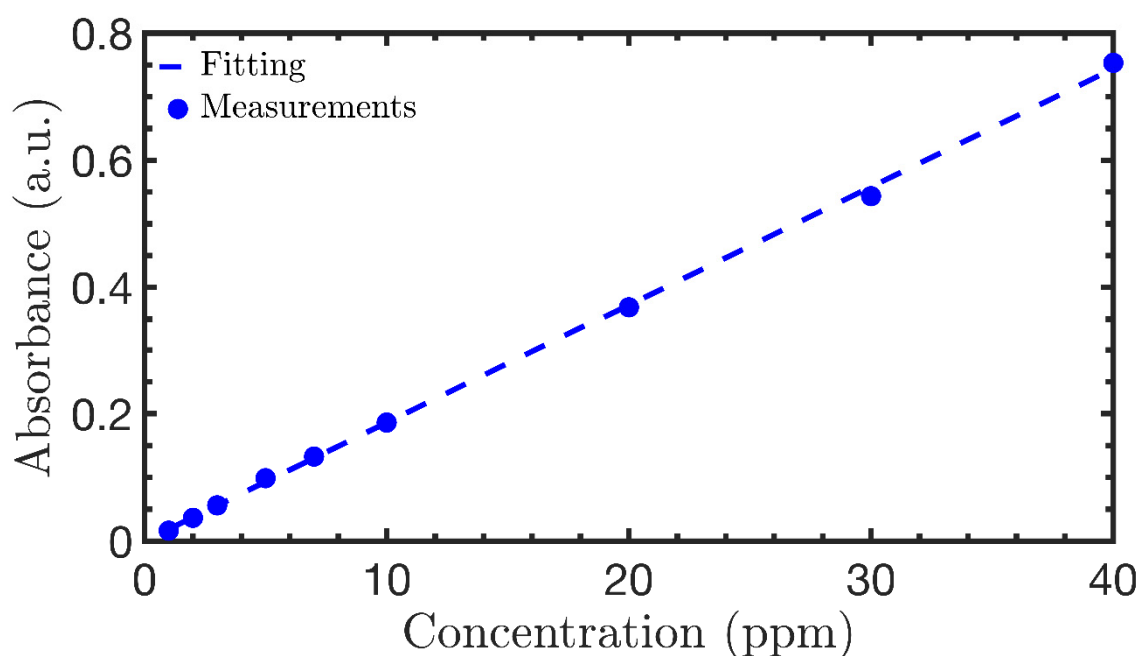

**Figure S1.** Calibration curve of  $\text{H}_2\text{O}_2$  using spectrophotometer measured at a wavelength of 405 nm.

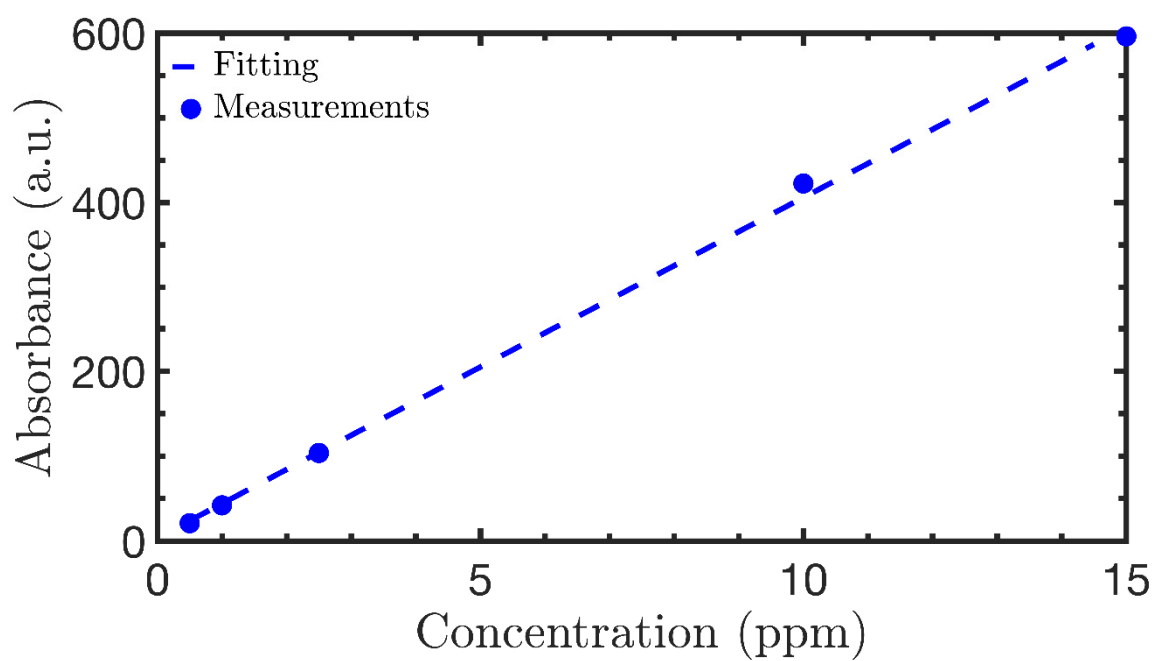

**Figure S2.** Calibration curve of 4-hydroxybenzoic acid used for the quantification of  $\cdot\text{OH}$ , using the HPLC.

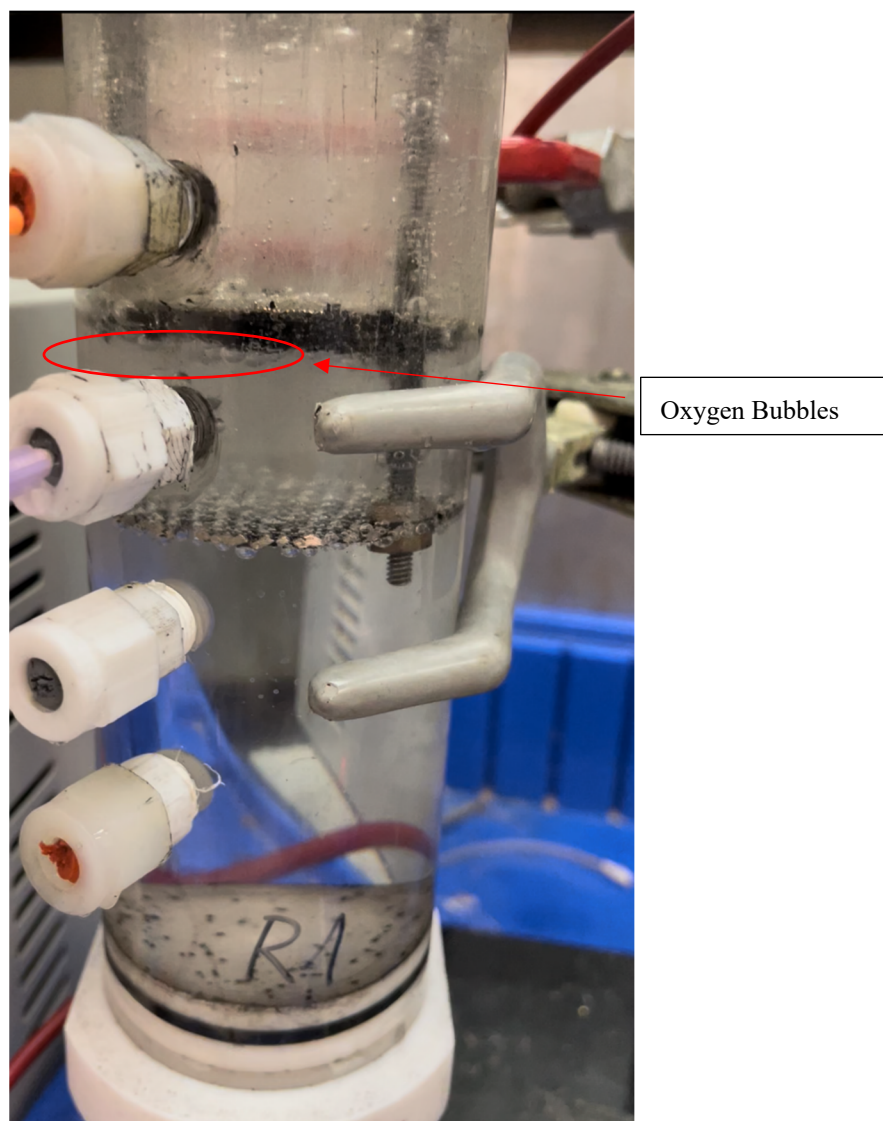

**Figure S3.** Electrochemical flow-through reactor showing the bubble accumulation at the surface of the cathode.
